# Supplementary material
Source: Research Square preprint supplement (doi:10.21203/rs.3.rs-10061845/v1)
Supplement: Supplementary file 1 [file 6848866d84f917d259f4dcec.docx]

**Appendix A: F-test and Breusch-Pagan Lagrange multiplier test**

**Appendix A1: F test**

| **Model** | **P-value** | **Conclusion** |
| --- | --- | --- |
| Downward EM | 0.9983 | Accept H0 |
| Upward EM | 0.0000 | Reject H0 |
| Total EM | 0.4829 | Accept H0 |

1. Downward EM F-test


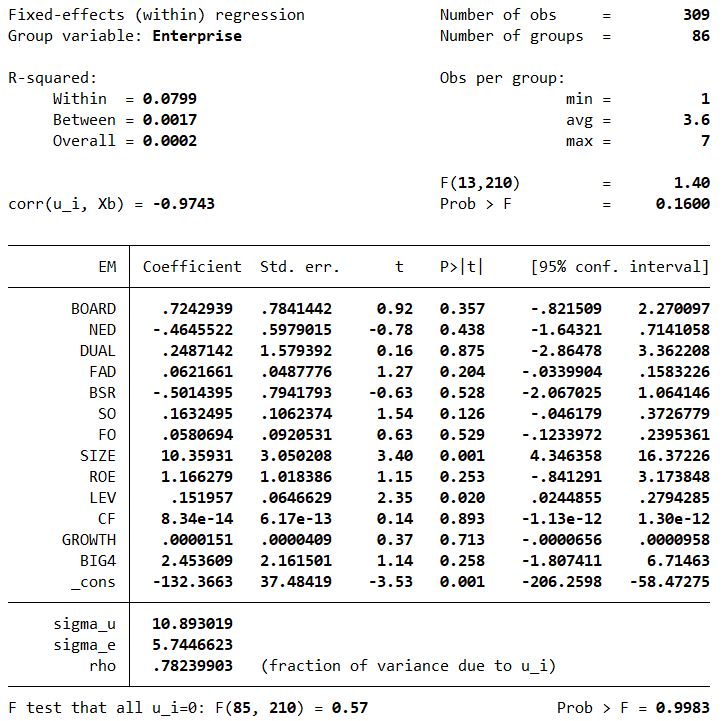


1. Upward EM F-test


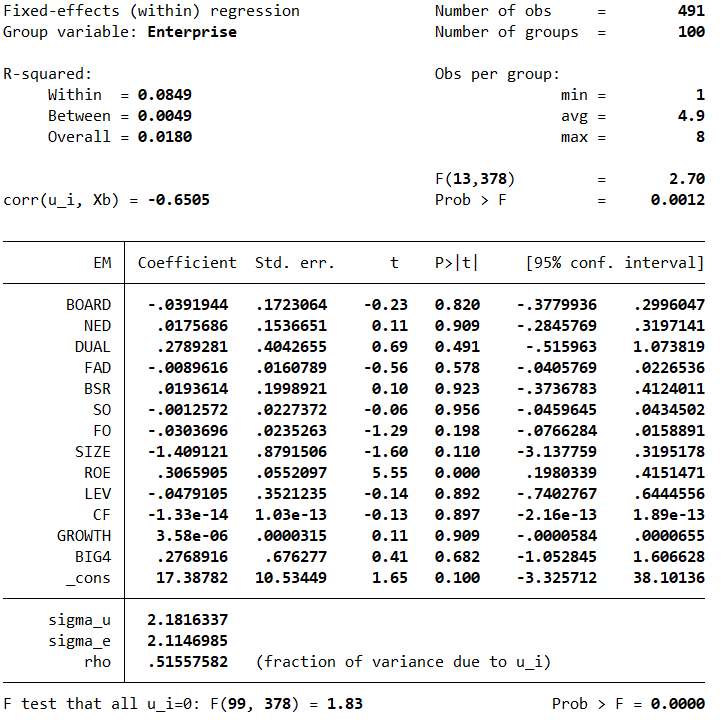


1. Total EM F-test


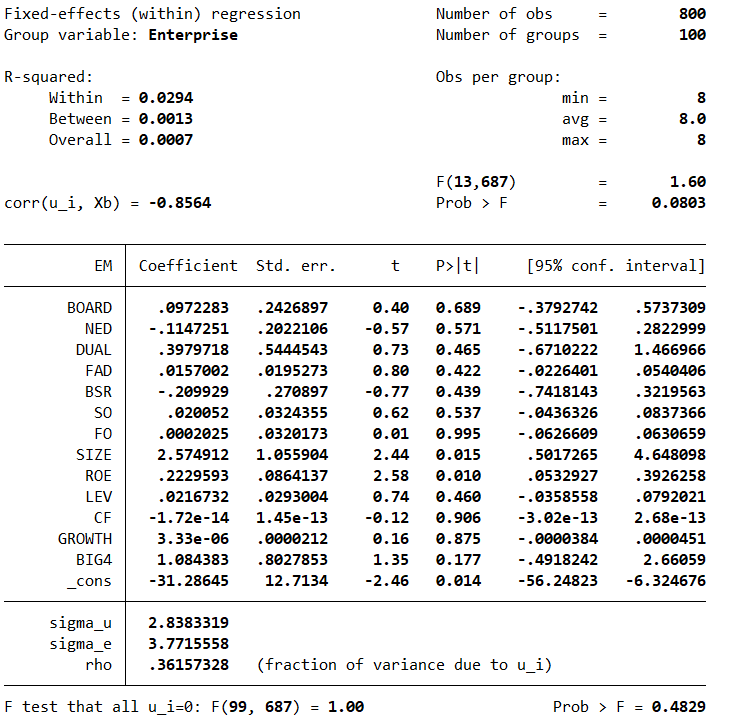


**Appendix A2: Breusch-Pagan Lagrange multiplier test**

| **Model** | **P-value** | **Conclusion** |
| --- | --- | --- |
| Downward | 1.0000 | Accept H0 |
| Upward | 0.4034 | Accept H0 |
| Total | 1.0000 | Accept H0 |

1. Downward EM Breusch - Pagan Test


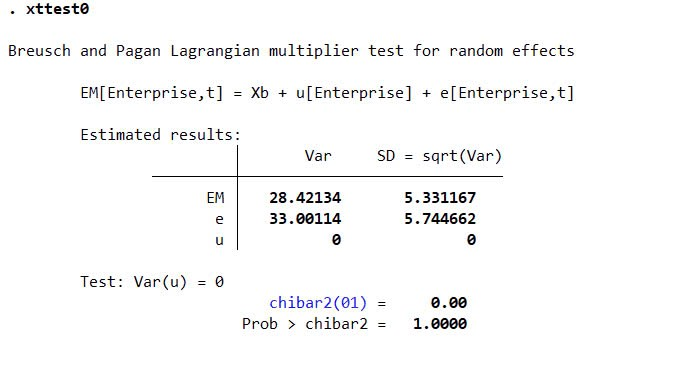


1. Upward EM Breusch - Pagan Test


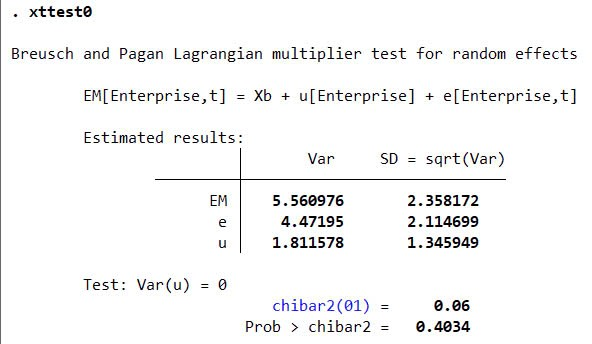


1. Total EM Breusch - Pagan Test


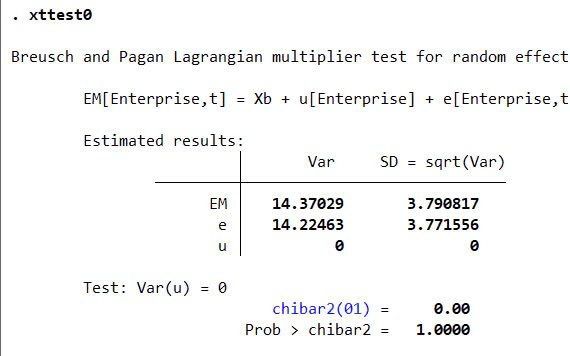


**Appendix B: List of 100 Vietnam corporates used in this study**

| Number | Stock ticker | Name |
| --- | --- | --- |
| 1 | CAV | Vietnam Electric Cable Corporation |
| 2 | CJC | Central Area Electrical Mechanical JSC |
| 3 | EMC | Thu Duc Electro Mechanical Joint Stock Company |
| 4 | EMG | Electrical Mechanical Equipment And Spare Parts JSC |
| 5 | GEX | GELEX Group JSC |
| 6 | KIP | Vietnam K.I.P JSC |
| 7 | ASP | An Pha petrol Joint Stock Company |
| 8 | CNG | CNG VietNam Joint Stock Company |
| 9 | GAS | PetroVietnam Gas Joint Stock Corporation |
| 10 | GSP | International Gas Product Shipping JSC |
| 11 | HFC | HFC Petrol Joint Stock Company |
| 12 | PEG | Petec Trading and Investment Corporation |
| 13 | PEQ | Petrolimex Equipment Joint Stock Company |
| 14 | PIC | PC3-Investment Joint Stock Company |
| 15 | PJC | Petrolimex Hanoi Transportation & Trading JSC |
| 16 | VTO | Viet Nam Tanker Joint Stock Company |
| 17 | BTT | Ben Thanh Trading & Service Joint Stock Company |
| 18 | CMV | CaMauTradingJointStockCompany |
| 19 | COM | Materials-PetroleumJointStockCompany |
| 20 | DGW | DIGIWORLD CORP |
| 21 | HAX | Hang Xanh Motors Service Joint Stock Company |
| 22 | HFX | Thanh Ha Export-Import Company |
| 23 | HTC | HocMon Trade Joint Stock Company |
| 24 | MSN | Masan Group Corporation |
| 25 | PET | Petrovietnam General Services JSC Corporation |
| 26 | PIT | Petrolimex International Trading Joint Stock Company |
| 27 | PNG | Phu Nhuan Trading Joint Stock Company |
| 28 | PNJ | Phu Nhuan Jewelry Joint Stock Company |
| 29 | VNM | Viet Nam Dairy Products Joint Stock Company |
| 30 | BVG | Bac Viet Group Joint Stock Company |
| 31 | DTL | Dai Thien Loc Corporation |
| 32 | HMC | VNSTEEL HOCHIMINH CITY METAL CORPORATION |
| 33 | HPG | Hoa Phat Group JSC |
| 34 | HSG | Hoa Sen Group |
| 35 | NKG | Nam Kim Steel Joint Stock Company |
| 36 | TVN | VietNam Steel Corporation |
| 37 | VCA | VNSTEEL-VICASA JSC |
| 38 | VDT | Vietourist Travel JSC |
| 39 | VGS | Vietnam Germany Steel Pipe JSC |
| 40 | ACV | Airports Corporation Of VietNam |
| 41 | SAS | Southern Airports Services JSC |
| 42 | SCS | SCSC Cargo Service Corporation |
| 43 | BCP | BCP JOINT STOCK COMPANY |
| 44 | DBM | Dak Lak Pharmaceutical Medical Equipment JSC |
| 45 | DBT | Ben Tre Pharmaceutical Joint Stock Company |
| 46 | DCL | Cuu Long Pharmaceutical JSC |
| 47 | DHG | DHG Pharmaceutical Joint Stock Company |
| 48 | DMC | Domesco Medical Import Export Joint Stock Corporation |
| 49 | DPP | Dong Nai Pharmaceutical JSC |
| 50 | IMP | Imexpharm Corporation |
| 51 | MTP | Medipharco Pharmaceutical JSC |
| 52 | NDC | Nam Duoc JSC |
| 53 | OPC | OPC Pharmaceutical Joint Stock Company |
| 54 | PMC | Pharmedic Pharmaceutical Medicinal JSC |
| 55 | VMD | Vimedimex Medi-Pharma Joint Stock Company |
| 56 | AAM | Mekong Fisheries Joint Stock Company |
| 57 | ABT | Bentre Aquaproduct Import And Export JSC |
| 58 | AGF | Angiang Fisheries Import Export JSC |
| 59 | CMX | Camimex Group JSC |
| 60 | ICF | Investment Commerce Fisheries Corporation |
| 61 | AAA | AnPhat Bioplastics JSC |
| 62 | IDI | I.D.I International Development & Investment Corporation |
| 63 | MPC | Minh Phu SeafoodCorporation |
| 64 | SCO | Sea Products Mechanical Shareholding Company |
| 65 | SEA | Vietnam Seaproducts Joint Stock Corporation |
| 66 | SGN | Saigon Ground Services JSC |
| 67 | SNC | NamCan Seaproducts Import Export Joint Stock Company |
| 68 | SPD | DaNang Seaproducts Import-Export Corporation |
| 69 | SPH | Seaprodex Hanoi Joint Stock Company |
| 70 | VHC | Vinh Hoan Corporation |
| 71 | VNH | Viet Nhat Investment Corporation |
| 72 | ADS | Dam San Joint Stock Company |
| 73 | EVE | Everpia JS |
| 74 | GIL | Binh Thanh Import-Export Production & Trade JSC |
| 75 | GMC | Garmex Saigon Corporation |
| 76 | HDM | Hue Textile Garment JSC |
| 77 | HSM | Ha Noi Textile and Garment Joint Stock Corporation |
| 78 | KMR | Mirae JSC |
| 79 | MNB | NhaBe Garment Corporation-Joint Stock Company |
| 80 | ARM | General Aviation Import Export JSC |
| 81 | BSC | Ben Thanh Service JointStock Company |
| 82 | CCP | HaiPhong Cua Cam Port Joint Stock Company |
| 83 | CCR | Cam Ranh Port Joint Stock Company |
| 84 | CDN | Danang Port Joint Stock Company |
| 85 | CLL | CatLai Port Joint Stock Company |
| 86 | CMP | Chan May Port Joint Stock Company |
| 87 | DDM | Dong Do Marine Joint Stock Company |
| 88 | DNL | Dang Nang Port Logistics JSC |
| 89 | DVC | Hai Phong Port Trading And Services JSC |
| 90 | DVP | Dinh Vu Port Investment and Development JSC |
| 91 | DXP | Doan Xa Port JSC |
| 92 | GMD | Gemadept Corporation |
| 93 | GSP | International Gas Product Shipping JSC |
| 94 | HAH | Hai An Transport & Stevedoring JSC |
| 95 | HCT | Hai Phong Cement Transport & Trading JSC |
| 96 | HHG | Hoang Ha Joint Stock Company |
| 97 | HMH | Hai Minh Corporation |
| 98 | HTV | Logistics Vicem Joint Stock Company |
| 99 | SGP | Saigon Port Joint Stock Company |
| 100 | SKG | Superdong Fast Ferry Kien Giang JSC |
